# Supplementary material for: Effect of Inter-Reader Variability on Diffusion-Weighted MRI Apparent Diffusion Coefficient Measurements and Prediction of Pathologic Complete Response for Breast Cancer
Source: MDPI journal article supplement (doi:10.3390/tomography8030099), 2022-04-22
Supplement: s1 [file s1]

## Supplements

**Supplemental Table S1.** ICC values for ADC metrics

|    | ADC metrics | ICC (95% CI)                  |                             |                        |
|----|-------------|-------------------------------|-----------------------------|------------------------|
|    |             | Multiple-slice restricted ROI | Single-slice restricted ROI | Single-slice tumor ROI |
| T0 | MEAN        | 0.98 (0.97,0.987)             | 0.964 (0.947,0.975)         | 0.978 (0.963,0.986)    |
|    | MINIMUM     | 0.791 (0.655,0.868)           | 0.821 (0.738,0.877)         | 0.929 (0.895,0.953)    |
|    | MAXIMUM     | 0.808 (0.73,0.865)            | 0.83 (0.759,0.881)          | 0.88 (0.829,0.917)     |
|    | PCTL 05     | 0.942 (0.909,0.962)           | 0.939 (0.911,0.958)         | 0.965 (0.947,0.976)    |
|    | PCTL 15     | 0.975 (0.962,0.984)           | 0.963 (0.946,0.975)         | 0.975 (0.961,0.984)    |
|    | PCTL 25     | 0.968 (0.953,0.979)           | 0.954 (0.934,0.969)         | 0.977 (0.965,0.984)    |
|    | PCTL 50     | 0.981 (0.971,0.987)           | 0.964 (0.947,0.975)         | 0.974 (0.956,0.984)    |
|    | PCTL 75     | 0.973 (0.961,0.982)           | 0.946 (0.922,0.963)         | 0.964 (0.943,0.976)    |
|    | PCTL 95     | 0.93 (0.906,0.955)            | 0.92 (0.885,0.945)          | 0.936 (0.902,0.958)    |
| T1 | MEAN        | 0.983 (0.974,0.988)           | 0.98 (0.97,0.986)           | 0.963 (0.941,0.976)    |
|    | MINIMUM     | 0.94 (0.912,0.958)            | 0.95 (0.925,0.966)          | 0.952 (0.93,0.967)     |
|    | MAXIMUM     | 0.848 (0.785,0.894)           | 0.881 (0.831,0.918)         | 0.929 (0.893,0.952)    |
|    | PCTL 05     | 0.964 (0.948,0.975)           | 0.961 (0.943,0.973)         | 0.957 (0.937,0.97)     |
|    | PCTL 15     | 0.968 (0.953,0.978)           | 0.966 (0.951,0.977)         | 0.934 (0.905,0.955)    |
|    | PCTL 25     | 0.978 (0.967,0.985)           | 0.978 (0.967,0.985)         | 0.955 (0.934,0.969)    |
|    | PCTL 50     | 0.975 (0.96,0.984)            | 0.974 (0.962,0.982)         | 0.953 (0.925,0.969)    |
|    | PCTL 75     | 0.971 (0.957,0.98)            | 0.968 (0.954,0.978)         | 0.964 (0.945,0.976)    |
|    | PCTL 95     | 0.909 (0.869,0.937)           | 0.914 (0.876,0.941)         | 0.937 (0.906,0.957)    |

|               |         |                      |                     |                     |
|---------------|---------|----------------------|---------------------|---------------------|
| $\Delta$ ADC% | MEAN    | 0.973 (0.961,0.982)  | 0.94 (0.912,0.959)  | 0.937 (0.908,0.957) |
|               | MINIMUM | 0.045 (-0.145,0.232) | 0.083 (-0.109,0.27) | 0.858 (0.797,0.901) |
|               | MAXIMUM | 0.71 (0.599,0.794)   | 0.723 (0.616,0.804) | 0.781 (0.692,0.846) |
|               | PCTL 05 | 0.909 (0.866,0.939)  | 0.921 (0.885,0.946) | 0.931 (0.9,0.953)   |
|               | PCTL 15 | 0.951 (0.928,0.967)  | 0.942 (0.915,0.96)  | 0.885 (0.835,0.921) |
|               | PCTL 25 | 0.955 (0.934,0.969)  | 0.944 (0.919,0.962) | 0.921 (0.885,0.946) |
|               | PCTL 50 | 0.961 (0.943,0.974)  | 0.936 (0.907,0.956) | 0.931 (0.899,0.953) |
|               | PCTL 75 | 0.954 (0.933,0.969)  | 0.899 (0.854,0.93)  | 0.917 (0.88,0.943)  |
|               | PCTL 95 | 0.844 (0.778,0.892)  | 0.784 (0.696,0.848) | 0.85 (0.786,0.896)  |

**Supplemental Table S2.** AUC values for predicting pCR using ROIs delineated by two readers

| PERCENT<br>CHANGE<br>of ADC<br>metrics | AUC (95% CI)                     |                               |                               |                               |                           |                        |
|----------------------------------------|----------------------------------|-------------------------------|-------------------------------|-------------------------------|---------------------------|------------------------|
|                                        | Multiple-slice restricted<br>ROI |                               | Single-slice restricted ROI   |                               | Single-slice tumor<br>ROI |                        |
|                                        | Reader 1                         | Reader 2                      | Reader 1                      | Reader 2                      | Reader 1                  | Reader 2               |
| MEAN                                   | <b>0.653</b><br>(0.515,0.79)     | <b>0.668</b><br>(0.529,0.807) | <b>0.638</b><br>(0.504,0.773) | <b>0.631</b><br>(0.501,0.761) | 0.579<br>(0.45,0.708)     | 0.559<br>(0.429,0.689) |
| MINIMUM                                | 0.619<br>(0.479,0.758)           | <b>0.668</b><br>(0.534,0.803) | 0.599<br>(0.471,0.727)        | 0.591<br>(0.465,0.716)        | 0.602<br>(0.475,0.73)     | 0.597<br>(0.467,0.728) |
| MAXIMUM                                | 0.489<br>(0.364,0.614)           | 0.488<br>(0.367,0.608)        | 0.541<br>(0.417,0.664)        | 0.547<br>(0.424,0.669)        | 0.496<br>(0.374,0.618)    | 0.384<br>(0.266,0.503) |
| PCTL 05                                | 0.591<br>(0.449,0.734)           | 0.637<br>(0.497,0.777)        | 0.589<br>(0.454,0.724)        | 0.599<br>(0.468,0.731)        | 0.528<br>(0.396,0.66)     | 0.538<br>(0.403,0.674) |
| PCTL 15                                | 0.631<br>(0.493,0.769)           | 0.63<br>(0.488,0.772)         | 0.598<br>(0.464,0.732)        | 0.591<br>(0.457,0.725)        | 0.561<br>(0.431,0.692)    | 0.549<br>(0.418,0.68)  |
| PCTL 25                                | 0.633<br>(0.496,0.77)            | <b>0.655</b><br>(0.514,0.797) | 0.611<br>(0.476,0.746)        | 0.608<br>(0.474,0.742)        | 0.556<br>(0.421,0.691)    | 0.578<br>(0.444,0.712) |

|         |                               |                               |                               |                               |                               |                               |
|---------|-------------------------------|-------------------------------|-------------------------------|-------------------------------|-------------------------------|-------------------------------|
| PCTL 50 | <b>0.627</b><br>(0.492,0.762) | <b>0.625</b><br>(0.486,0.763) | <b>0.627</b><br>(0.493,0.761) | <b>0.611</b><br>(0.481,0.742) | <b>0.57</b><br>(0.439,0.7)    | <b>0.547</b><br>(0.417,0.677) |
| PCTL 75 | <b>0.624</b><br>(0.491,0.758) | <b>0.622</b><br>(0.487,0.758) | <b>0.609</b><br>(0.476,0.742) | <b>0.595</b><br>(0.466,0.723) | <b>0.554</b><br>(0.431,0.677) | <b>0.542</b><br>(0.414,0.669) |
| PCTL 95 | <b>0.598</b><br>(0.471,0.726) | <b>0.608</b><br>(0.479,0.737) | <b>0.615</b><br>(0.486,0.743) | <b>0.573</b><br>(0.447,0.7)   | <b>0.557</b><br>(0.434,0.68)  | <b>0.48</b><br>(0.361,0.6)    |

Numbers in bold had 95% CI above 0.5
